# Supplementary material for: Survey of Surface Proteins from the Pathogenic Mycoplasma hyopneumoniae Strain 7448 Using a Biotin Cell Surface Labeling Approach
Source: PLoS One. 2014 Nov 11;9(11):e112596. doi: 10.1371/journal.pone.0112596 (PMC4227723; doi:10.1371/journal.pone.0112596)
Supplement: Table S4 — Lipoprotein predictions. (XLSX) [file pone.0112596.s005.xlsx]

## Sheet: Lipoprotein prediction
Supplementary Table 4 - Lipoprotein predictions. Proteins in bold were also identified in GeLC-MS/MS analysis.
			LIPOPREDICT 3	LIPO CBU 4		GOG 5
Locus tag 1	Protein product 2	Protein name	Prediction	LipoBox Similarity	Cleavage site	COG class	Surface localized 6
MHP7448_0036	YP_287436.1	Hypothetical protein MHP7448_0036	LP	Low	19	no COG	yes
MHP7448_0112	YP_287510.1	Hypothetical protein MHP7448_0112	LP	Medium	23	no COG	yes
MHP7448_0118	YP_287516.1	Hypothetical protein MHP7448_0118	LP	Low	32	E	yes
MHP7448_0217	YP_287614.1	Lipoprotein	LP	Medium	21	no COG	yes
MHP7448_0299	YP_287695.1	Hypothetical protein MHP7448_0299	NLP	Low	24	no COG	yes
MHP7448_0324	YP_287719.1	Hypothetical protein MHP7448_0324	LP	__	__	no COG	no
MHP7448_0353	YP_287747.1	P60-like lipoprotein	LP	Medium	30	no COG	yes
MHP7448_0356	YP_287750.1	Hypothetical protein MHP7448_0356	LP	Low	22	no COG	no
MHP7448_0360	YP_287754.1	P37-like ABC transporter substrate-binding lipoprotein	LP	__	__	no COG	yes
MHP7448_0366	YP_287760.1	Lipoprotein	LP	__	__	no COG	yes
MHP7448_0367	YP_287761.1	Lipoprotein	LP	Low	25	no COG	yes
MHP7448_0368	YP_287762.1	Putative lipoprotein	LP	__	__	L	yes
MHP7448_0378	YP_287772.1	Lipoprotein	LP	Medium	24	no COG	no
MHP7448_0399	YP_287791.1	Hypothetical protein MHP7448_0399	NLP	Medium	28	no COG	yes
MHP7448_0408	YP_287800.1	Hypothetical protein MHP7448_0408	LP	Low	28	no COG	no
MHP7448_0433	YP_287824.1	Hypothetical protein MHP7448_0433	LP	Low	23	no COG	yes
MHP7448_0467	YP_287857.1	Hypothetical protein MHP7448_0467	LP	Medium	24	no COG	yes
MHP7448_0468	YP_287858.1	Hypothetical protein MHP7448_0468	LP	Medium	22	no COG	yes
MHP7448_0513	YP_287902.1	46K surface antigen precursor	LP	Medium	31	G	yes
MHP7448_0604	YP_287990.1	ABC transporter xylose-binding lipoprotein	LP	__	__	R	yes
MHP7448_0621	YP_288007.1	Lipoprotein	LP	__	__	no COG	no
MHP7448_0629	YP_288014.1	Hypothetical protein MHP7448_0629	LP	__	__	no COG	yes
MHP7448_0656	YP_288041.1	Prolipoprotein p65	LP	Low	30	no COG	yes
MHP7448_0660	YP_288045.1	Hypothetical protein MHP7448_0660	LP	Low	32	no COG	no
MHP7448_0661	YP_288046.1	Hypothetical protein MHP7448_0661	LP	Medium	29	no COG	yes
